# Supplementary material for: Circulating miRNAs in Women with Polycystic Ovary Syndrome: A Longitudinal Cohort Study
Source: MDPI journal article supplement (doi:10.3390/cells12070983), 2023-03-23
Supplement: s1 [file s1]

Article

# Supplementary Materials: Circulating miRNAs in Women with Polycystic Ovary Syndrome: A Longitudinal Cohort Study

Pernille B. Udesen <sup>1,†</sup>, Anja E. Sørensen <sup>2,†</sup>, Rikke Svendsen <sup>2</sup>, Nanna L. S. Frisk <sup>2</sup>, Anne L. Hess <sup>3</sup>, Mubeena Aziz <sup>4</sup>, Marie Louise M. Wissing <sup>2</sup>, Anne Lis M. Englund <sup>1</sup> and Louise T. Dalgaard <sup>2,\*</sup>

**Supplementary Table S1: List of microRNAs, Taqman, miRNA mature sequences tested on the 96-miR custom card and phenotype associations previously reported**

| Mature miRNA   | TaqMan ID | Sequence                 | Phenotype association                                  | Pubmed reference ID |
|----------------|-----------|--------------------------|--------------------------------------------------------|---------------------|
| ath-miR-159a   | 338       | uuuggauugaagggagcucua    | -                                                      |                     |
| cel-miR-39-3p  | 200       | ucaccggguguaaaucagcuug   | -                                                      |                     |
| dme-miR-7-5p   | 268       | uggaagacuagugauuuuguugu  | -                                                      |                     |
| U6             | 1973      | -                        | -                                                      |                     |
| miR-133a-3p    | 2246      | uuugguccccuuaaccagcug    | PCOS (FF)                                              | PMID: 23666971      |
| miR-625-3p     | 2431      | gacuaauagaacuuuuuuuuu    | Associated with cholesterol levels                     | PMID: 24784704      |
| mmu-miR-140-5p | 1187      | cagugguuuuuacccuauugguag | Associated with granulosa cell proliferation           | PMID: 32024547      |
| miR-1225-3p    | 2766      | ugagccccugugccgccccag    | Associated with inflammation                           | PMID: 29496996      |
| miR-519b-3p    | 2384      | aaagugcauccuuuuuagagguu  | Associated with inflammation                           | PMID: 32146774      |
| miR-221-3p     | 524       | agcuacauugucugggguuuc    | Associated with inflammation                           | PMID: 35120179      |
| miR-107        | 443       | agcagcauuguacagggcuauca  | Associated with insulin resistance                     | PMID: 21654750      |
| miR-664a-3p    | 2897      | uauucauuuuauccccagccuaca | Associated with insulin resistance                     | PMID: 29495974      |
| miR-363-3p     | 1271      | aaugcacgguaucacugua      | Associated with insulin resistance                     | PMID: 32104036      |
| miR-886-3p     | 2194      | cgcgggugcuuacugacccuu    | Associated with metabolic syndrome                     | PMID: 34294131      |
| miR-122-5p     | 2245      | uggagugugacaugguguuug    | Associated with metabolic syndrome and Type 2 diabetes | PMID: 27899485      |
| miR-30b-5p     | 602       | uguaaacauccuacacucagcu   | Associated with NAFLD                                  | PMID: 28119530      |

---

|             |      |                         |                                                              |                |
|-------------|------|-------------------------|--------------------------------------------------------------|----------------|
| miR-190b    | 2263 | ugauauguuugauauuggguu   | Associated with NAFLD                                        | PMID: 29575055 |
| miR-629-5p  | 2436 | uggguuuacguugggagaacu   | Biomarker of ovarian cancer                                  | PMID: 28972400 |
| miR-193b-3p | 2367 | aacuggcccucaaaguccgcgu  | Circulating biomarker for impaired glucose tolerance in PCOS | PMID: 26860517 |
| miR-194-5p  | 493  | uguaacagcaacuccaugugga  | Circulating biomarker for impaired glucose tolerance in PCOS | PMID: 26860517 |
| miR-19b-3p  | 396  | ugugcaaaucgaugcaaacuga  | Circulating biomarker for PCOS                               | PMID: 32411089 |
| miR-17-5p   | 2308 | caaagugcuuacagucagguag  | Circulating biomarker of metabolic syndrome                  | PMID: 23032062 |
| miR-195-5p  | 494  | uagcagcacagaaauauuggc   | Circulating biomarker of metabolic syndrome                  | PMID: 23032062 |
| miR-324-3p  | 2161 | acugccccaggugcugcugg    | Circulating biomarker of metabolic syndrome                  | PMID: 32353552 |
| miR-148a-3p | 470  | ucagugcacuacagaacuuugu  | Circulating biomarker of metabolic syndrome                  | PMID: 34954485 |
| miR-215-5p  | 518  | augaccuaugaauugacagac   | Circulating biomarker of obesity                             | PMID: 30651891 |
| miR-532-5p  | 1518 | caugccuugaguguaggaccgu  | Circulating biomarker of ovarian cancer                      | PMID: 26873729 |
| miR-376a-3p | 565  | aucauagaggaaaauccacgu   | Circulating biomarker of ovarian cancer                      | PMID: 27979415 |
| miR-518b    | 1156 | caaagcgcuccccuuuagaggu  | Circulating biomarker of ovarian cancer                      | PMID: 32083575 |
| miR-1305    | 2867 | uuuuaacucuaaugggagaga   | Circulating biomarker of ovarian cancer                      | PMID: 32854743 |
| miR-766-3p  | 1986 | acuccagccccacagccucagc  | Circulating biomarker of ovarian cancer                      | PMID: 32854743 |
| miR-1233-3p | 2768 | ugagcccuguccccgcag      | Circulating biomarker of ovarian cancer                      | PMID: 34899827 |
| miR-222-3p  | 2276 | agcuacaucuggcuacugggu   | PCOS (circulating)                                           | PMID: 24802714 |
| miR-30c-5p  | 419  | uguaaacauccuacacucucagc | PCOS (circulating)                                           | PMID: 24802714 |
| miR-223-3p  | 2295 | ugucaguuugucaaaauaccca  | PCOS (circulating)                                           | PMID: 26582398 |

---

---

|               |            |                         |                    |                |
|---------------|------------|-------------------------|--------------------|----------------|
| mmu-miR-93-5p | 1090       | caaagugcuguucgugcagguag | PCOS (circulating) | PMID: 26582398 |
| miR-4522      | 462414_mat | ugacucugccuguaggccggu   | PCOS (circulating) | PMID: 27677182 |
| miR-6767-5p   | 466470_mat | ucgcagacaggacacauggaga  | PCOS (circulating) | PMID: 27677182 |
| miR-23a-3p    | 399        | aucacauugccagggauuucc   | PCOS (circulating) | PMID: 28193283 |
| miR-23b-3p    | 400        | aucacauugccagggauuacc   | PCOS (circulating) | PMID: 28193283 |
| miR-9-5p      | 583        | ucuuugguuaucuagcuguauga | PCOS (circulating) | PMID: 30794820 |
| mmu-miR-451a  | 1141       | aaaccguuaccauuacugaguu  | PCOS (circulating) | PMID: 31730174 |
| miR-139-5p    | 2289       | ucuacagugcacguguccagu   | PCOS (circulating) | PMID: 31737638 |
| miR-143-3p    | 2249       | ugagaugaagcacuguagcuc   | PCOS (circulating) | PMID: 31737638 |
| miR-21-5p     | 397        | uagcuuauacagacugauguuga | PCOS (circulating) | PMID: 31737638 |
| miR-34a-5p    | 426        | uggcagugucuauagcugguugu | PCOS (circulating) | PMID: 31737638 |
| miR-34b-3p    | 2102       | caaucacuaacuccacugccau  | PCOS (circulating) | PMID: 31737638 |
| miR-361-5p    | 554        | uuaucagaauuccaggguac    | PCOS (circulating) | PMID: 31737638 |
| miR-433-3p    | 1028       | aucaugaugggcuccucggugu  | PCOS (circulating) | PMID: 31737638 |
| miR-485-3p    | 1277       | gucauacacggcuccucucu    | PCOS (circulating) | PMID: 31737638 |
| miR-572       | 1614       | guccgcucggcguggccca     | PCOS (circulating) | PMID: 31737638 |
| miR-27b-3p    | 409        | uucacaguggcuaaguucugc   | PCOS (circulating) | PMID: 32848854 |

---

---

|             |      |                         |                                                              |                |
|-------------|------|-------------------------|--------------------------------------------------------------|----------------|
| miR-106a-5p | 2169 | aaaagugcuuacagugcagguag | PCOS (circulating)                                           | PMID: 33041053 |
| miR-126-3p  | 2228 | ucguaccgugaguaaauaugcg  | PCOS (circulating)                                           | PMID: 33041053 |
| miR-146a-5p | 468  | ugagaacugaaauccauggguu  | PCOS (circulating)                                           | PMID: 33041053 |
| miR-18b-5p  | 2217 | uaaggugcaucuagugcaguuag | PCOS (circulating)                                           | PMID: 33041053 |
| miR-20a-5p  | 580  | uaaagugcuauagugcagguag  | PCOS (circulating)                                           | PMID: 33041053 |
| miR-16-5p   | 391  | uagcagcacguaauauuggcg   | PCOS (circulating)                                           | PMID: 33148068 |
| miR-145-5p  | 2278 | guccaguuuuccaggaaucccu  | PCOS (circulating)                                           | PMID: 33763302 |
| miR-192-5p  | 491  | cugaccuaugaauugacagcc   | PCOS (circulating)                                           | PMID: 33763302 |
| miR-103a-3p | 439  | agcagcauuguacagggcuauga | PCOS (circulating)                                           | PMID: 34403358 |
| miR-342-3p  | 2260 | ucucacacagaaucgcacccgu  | Insulin resistance (circulating)                             | PMID: 24784704 |
| miR-331-3p  | 545  | gccccugggccuauccuagaa   | Fatty acids (circulating)                                    | PMID: 24784704 |
| miR-330-3p  | 544  | gcaaagcacacggccugcagaga | Circulating levels regulated by fatty acids                  | PMID: 26092372 |
| miR-769-5p  | 1998 | ugagaccucuggguucugagcu  | Circulating levels regulated by fatty acids                  | PMID: 26092372 |
| miR-155-5p  | 2623 | uuaaugcuaaucgugauaggggu | Circulating biomarker of metabolic syndrome and inflammation | PMID: 26421388 |
| miR-130a-3p | 454  | cagugcaaugaugaagggcrau  | Controls theca cell androgen production                      | PMID: 31184707 |
| miR-142-3p  | 464  | uguaguguuuccuacuuuaugga | Dysregulated in PCOS granulosa cells                         | PMID: 30865275 |

---

---

|             |      |                          |                                         |                |
|-------------|------|--------------------------|-----------------------------------------|----------------|
| miR-423-5p  | 2340 | ugaggggcagagagcgagacuuu  | Dysregulated in PCOS<br>granulosa cells | PMID: 30865275 |
| miR-135a-5p | 460  | uauggcuuuuuauuccuauuguga | Dysregulated in PCOS<br>granulosa cells | PMID: 31173821 |
| miR-429     | 1024 | uaauacugucugguaaaaccgu   | Dysregulated in PCOS<br>granulosa cells | PMID: 32759991 |
| miR-224-5p  | 2099 | caagucacuagugguuccguu    | Granulosa cell proliferation            | PMID: 20118412 |
| miR-28-3p   | 2446 | cacuagauugugagcuccugga   | Granulosa cell proliferation            | PMID: 31322191 |
| miR-200b-3p | 2251 | uaauacugccugguaaugauga   | Granulosa cell proliferation            | PMID: 31421682 |
| let-7d-5p   | 2283 | agagguaguagguugcauaguu   | Granulosa cell proliferation            | PMID: 34246727 |
| miR-448     | 1029 | uugcauauaguaggauugccau   | Involved in ovarian cancer<br>growth    | PMID: 26103953 |
| miR-520c-3p | 2400 | aaagugcuuccuuuuagagggu   | PCOS (FF)                               | PMID: 23666971 |
| miR-383-5p  | 573  | agaucagaaggugauuguggcu   | PCOS (FF)                               | PMID: 24828505 |
| miR-132-3p  | 457  | uaacagucuacagccauggucg   | PCOS (FF)                               | PMID: 26771704 |
| miR-151-3p  | 2254 | cuagacugaagcuccuugagg    | PCOS (FF)                               | PMID: 26771704 |
| miR-151-5p  | 2642 | ucgaggagcucacagucuagu    | PCOS (FF)                               | PMID: 26771704 |
| miR-24-3p   | 402  | uggcucaguucagcaggaacag   | PCOS (FF)                               | PMID: 26771704 |
| miR-29a-3p  | 2112 | uagcaccaucugaaaucgguua   | PCOS (FF)                               | PMID: 26771704 |
| miR-320a    | 2277 | aaaagcuggguugagagggcga   | PCOS (FF)                               | PMID: 26771704 |
| miR-518f-3p | 2388 | gaaagcgcuucucuuuagagg    | PCOS (FF)                               | PMID: 26771704 |
| miR-574-3p  | 2349 | cacgcuaugcacacaccaca     | PCOS (FF)                               | PMID: 26771704 |
| miR-720     | 2895 | ucucgcuggggccucca        | PCOS (FF)                               | PMID: 26771704 |
| miR-127-3p  | 452  | ucggauccgucugagcuuggcu   | PCOS (FF)                               | PMID: 31705013 |
| miR-199b-5p | 500  | cccaguguuuagacuaucuguuc  | PCOS (FF)                               | PMID: 31705013 |

---

---

|               |      |                         |                          |                |
|---------------|------|-------------------------|--------------------------|----------------|
| miR-484       | 1821 | ucaggcucaguccccuccgau   | Possible reference miR   | PMID: 31737638 |
| miR-1267      | 2885 | ccuguugaaguguaaucccca   | Preliminary inhouse data | -              |
| miR-618       | 1593 | aaacucuacuuguccuucugagu | Preliminary inhouse data | -              |
| miR-636       | 2088 | ugugcuugcuguccgcccgca   | Preliminary inhouse data | -              |
| miR-138-5p    | 2284 | agcugguguugugaaucaggccg | Regulated by estradiol   | PMID: 24205079 |
| mmu-miR-96-5p | 186  | uuuggcacuagcacauuuuugcu | Regulated by estradiol   | PMID: 24205079 |
| miR-10b-5p    | 2218 | uaccuguagaaccgaauuugug  | Regulated by estradiol   | PMID: 33982889 |

---

MicroRNAs are human microRNAs (*hsa-miR*) unless otherwise specified. Some assays were designed for murine miRNAs, but in these cases the miRNA was completely homologous. PCOS (FF): Levels in follicular fluid associated with PCOS, PCOS (circulating): Levels in circulation associated with PCOS. NAFLD: Non-alcoholic fatty liver disease.

**Supplementary Table S2: Change in miRNA levels in women without PCOS from BL to FU.**

| miRNA Control | Reported association                                  | Difference in dCt ( $\pm$ SD) | Direction | n | p     | p <sub>adj</sub> |
|---------------|-------------------------------------------------------|-------------------------------|-----------|---|-------|------------------|
| miR-451a      | PCOS (circulating)                                    | 6.5 $\pm$ 3.5                 | Decreased | 7 | 0.003 | 0.29             |
| miR-16-5p     | PCOS (circulating)                                    | 5.1 $\pm$ 4.7                 | Decreased | 6 | 0.044 | 1.0              |
| miR-223-3p    | PCOS (circulating)                                    | 4.4 $\pm$ 3.8                 | Decreased | 8 | 0.013 | 1.0              |
| miR-532-5p    | Ovarian cancer (circulating)                          | 4.4 $\pm$ 1.1                 | Decreased | 3 | 0.021 | 1.0              |
| miR-1305      | Ovarian cancer (circulating)                          | 4.1 $\pm$ 2.1                 | Decreased | 4 | 0.03  | 1.0              |
| miR-24-3p     | PCOS (FF)                                             | 4.1 $\pm$ 3.9                 | Decreased | 7 | 0.032 | 1.0              |
| miR-342-3p    | Circulating levels associated with insulin resistance | 3.8 $\pm$ 3.1                 | Decreased | 7 | 0.017 | 1.0              |
| miR-720       | PCOS (FF)                                             | 3.4 $\pm$ 2.8                 | Decreased | 8 | 0.01  | 0.96             |
| miR-145-5p    | PCOS (circulating)                                    | 3.3 $\pm$ 1.8                 | Decreased | 7 | 0.003 | 0.29             |
| miR-127-3p    | PCOS (FF)                                             | 3.1 $\pm$ 0.7                 | Decreased | 3 | 0.017 | 1.0              |
| miR-151-3p    | PCOS (FF)                                             | 3.1 $\pm$ 2                   | Decreased | 7 | 0.006 | 0.58             |
| miR-146a-5p   | PCOS (circulating)                                    | 3 $\pm$ 2.7                   | Decreased | 6 | 0.042 | 1.0              |
| miR-130a-3p   | Controls theca cell androgen production               | 3 $\pm$ 0.4                   | Decreased | 3 | 0.005 | 0.48             |
| miR-320a-3p   | PCOS (FF)                                             | 2.6 $\pm$ 1                   | Decreased | 7 | 0.001 | 0.10             |
| miR-423-5p    | Dysregulated in PCOS granulosa cells                  | 2.3 $\pm$ 0.8                 | Decreased | 4 | 0.01  | 0.96             |
| miR-886-3p    | Associated with metabolic syndrome                    | 1.8 $\pm$ 1                   | Decreased | 5 | 0.018 | 1.0              |
| miR-518f-3p   | PCOS (FF)                                             | 7.4 $\pm$ 6.9                 | Increased | 6 | 0.047 | 1.0              |
| miR-520c-3p   | PCOS (FF)                                             | 10.6 $\pm$ 7.5                | Increased | 6 | 0.018 | 1.0              |
| miR-618       | -                                                     | 11.1 $\pm$ 9                  | Increased | 6 | 0.03  | 1.0              |
| miR-636       | -                                                     | 11.7 $\pm$ 7                  | Increased | 4 | 0.044 | 1.0              |
| miR-518b      | Ovarian cancer (circulating)                          | 15.9 $\pm$ 8.9                | Increased | 5 | 0.017 | 1.0              |

**Supplementary Table S2:** Changes in miRNA levels from BL to FU in control women. Shown are the mean fold change  $\pm$  standard deviation as well as the number of women included. Changes in expression levels were evaluated with a paired student t-test. \*) also reported in PCOS women in the current study. P values were corrected for multiple testing using Bonferroni corrections. PCOS (FF): Levels in follicular fluid associated with PCOS, PCOS (circulating): Levels in circulation associated with PCOS. Ovarian cancer (circulating): Circulating biomarker of ovarian cancer.

Supplementary Figure S1: ROC curve of free T

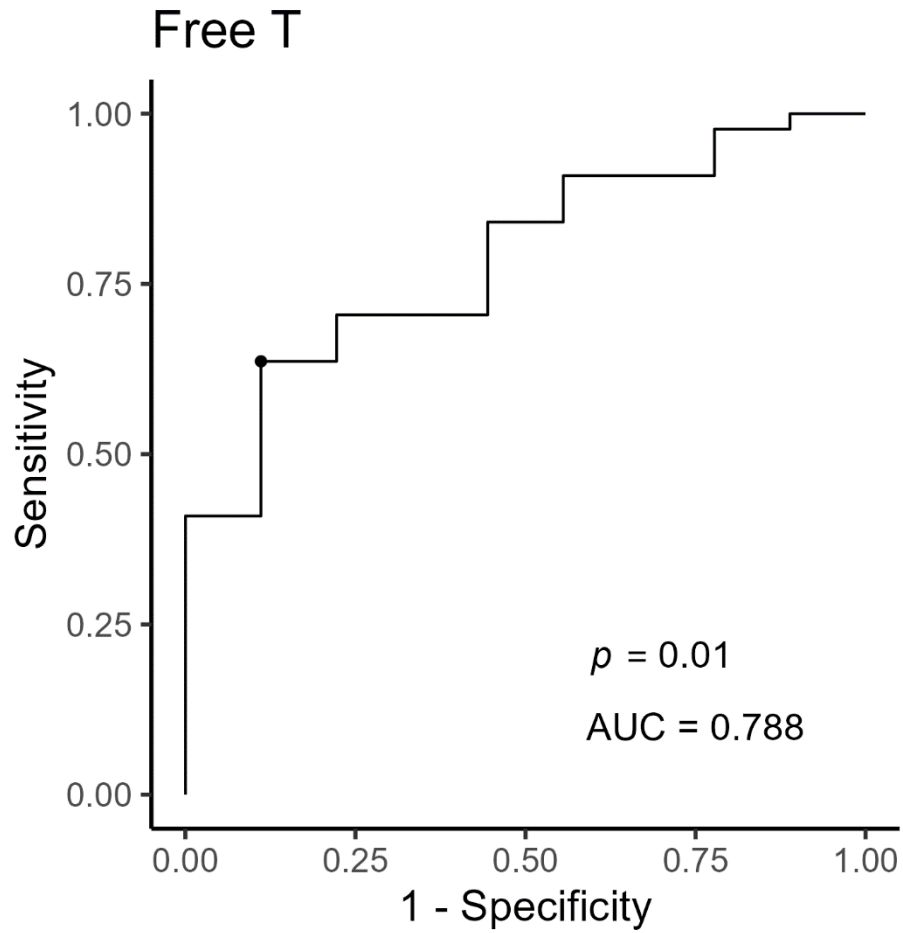

**Supplementary Figure S1:** ROC curve of free T in which age and BMI at BL was included in the logistic regression model.  $n = 53$ , sensitivity = 63% while specificity = 89%.



Supplementary Figure S2: Correlations between clinical and biochemical variables and miRNAs for women with PCOS, at BL or FU.

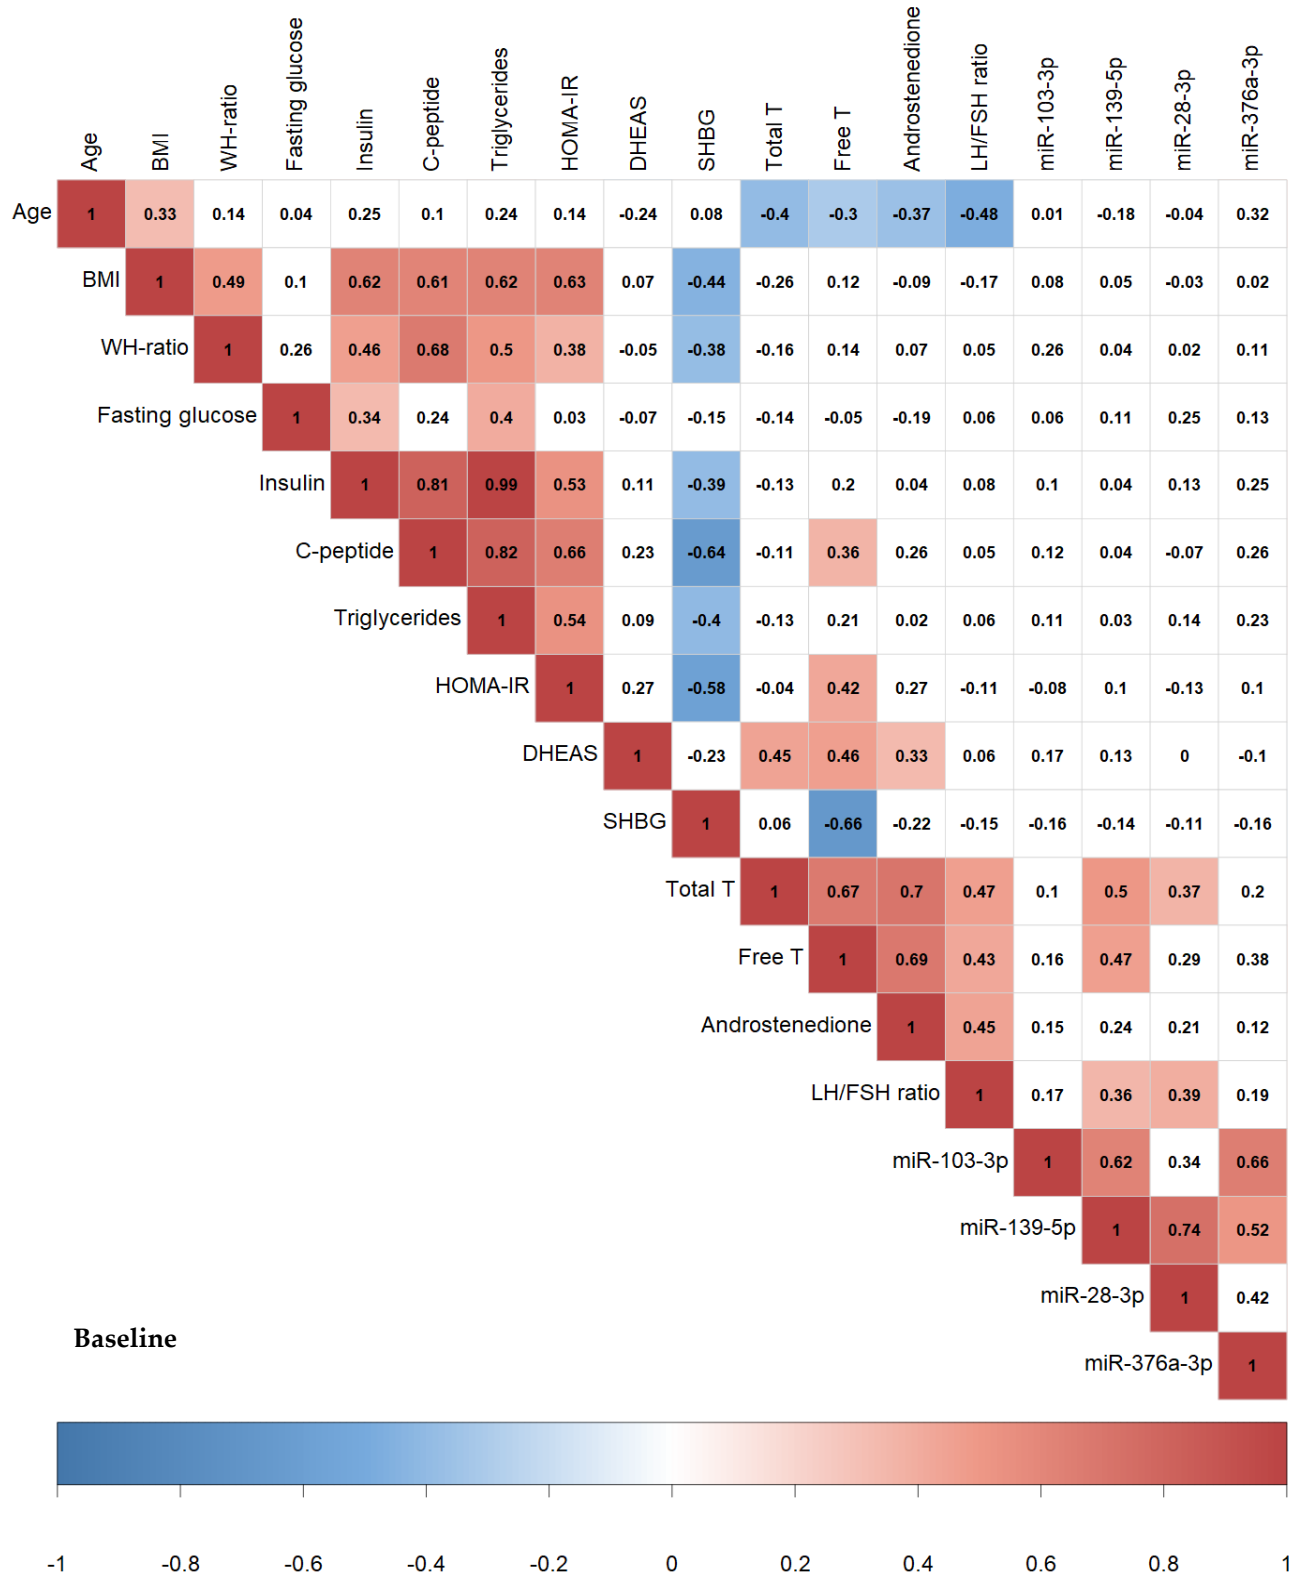

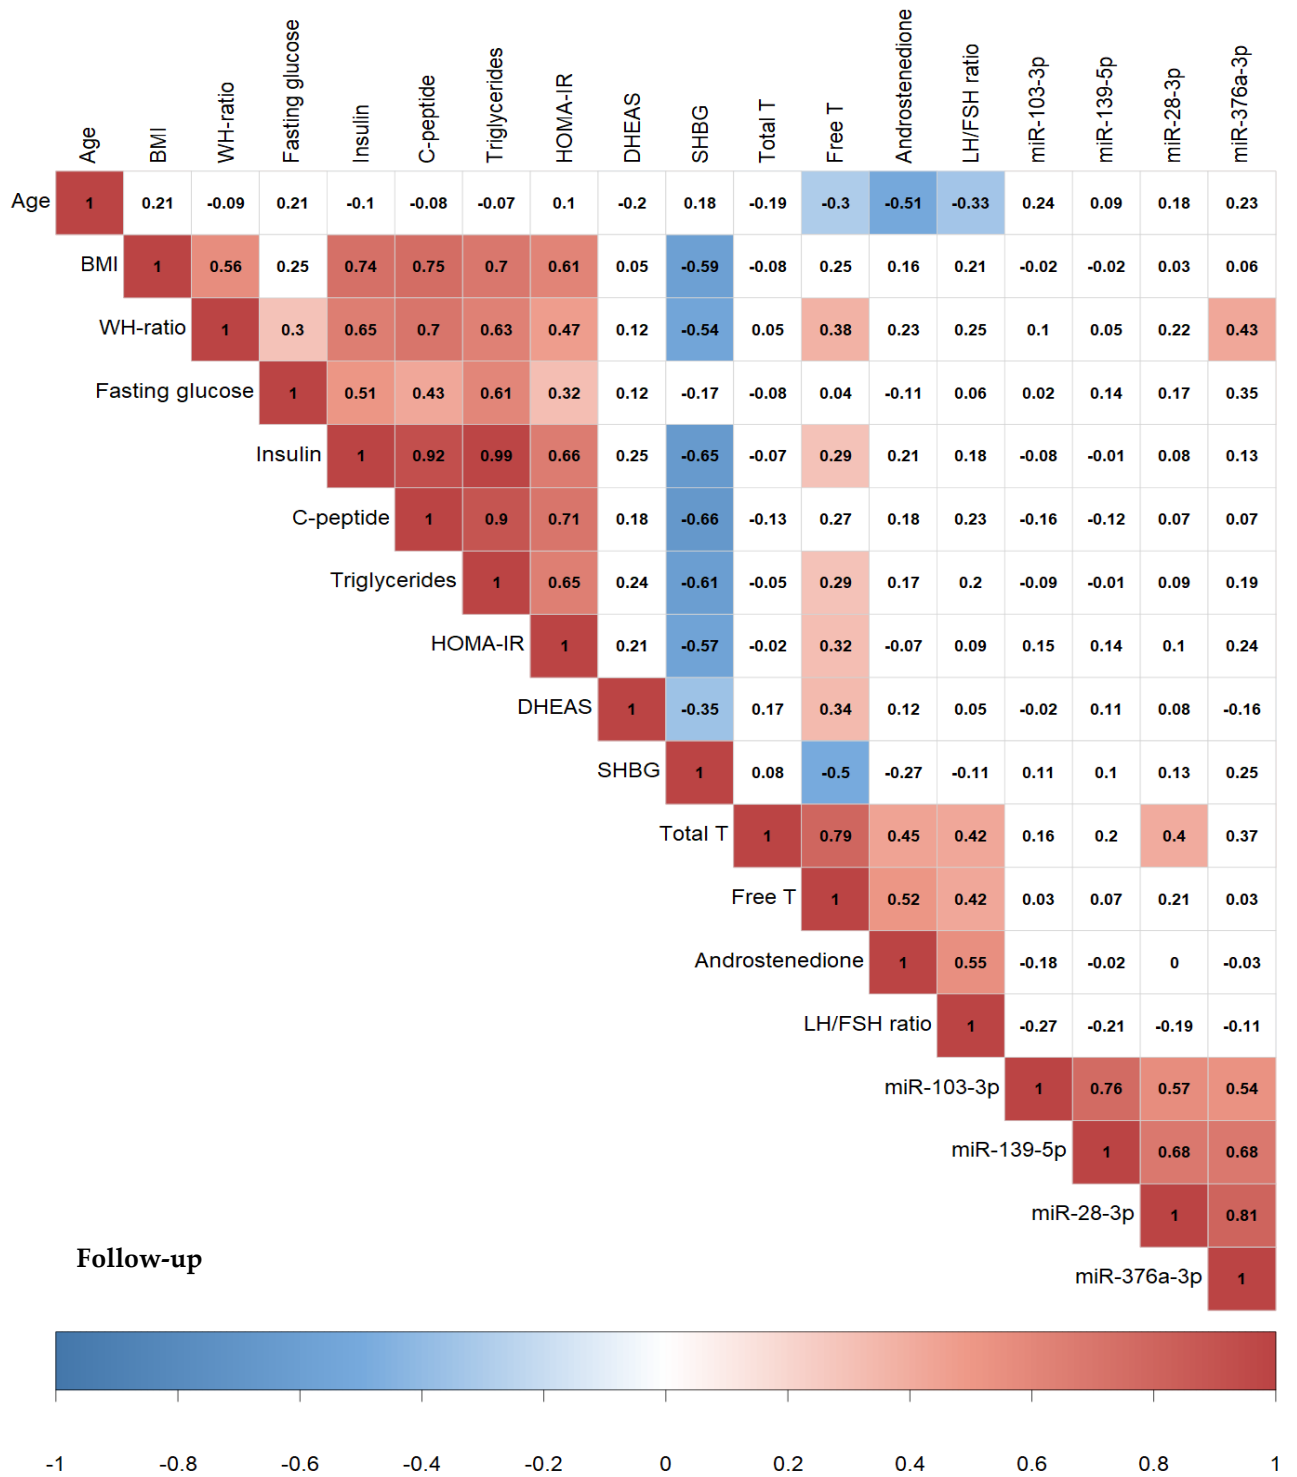

**Supplementary Figure S2:** Correlations between clinical and biochemical variables and the selected miRNAs, at either BL or FU, measured in women with PCOS. Colors represent significant ( $p \leq 0.05$ ) correlations by Spearman rho with color intensity ranging from -1 to +1.
